# Supplementary material
Source: ML conference proceedings conference paper supplement (https://openreview.net/forum?id=r8tMECbxOl)
Supplement: supplementary_material [file attachment]

## A APPENDIX

### A.1 NUMBER OF QUANTILES

We examine the effect of the number of quantiles on the performance of TDTransformer. Figure 5 shows the performance comparison. When decreasing the number of quantiles from 64 to 8, we observe a performance degradation. When increasing the number of quantiles from 64 to 256, we do not find a significant performance gain.

PLE does not break the continuity of the original numerical values. The number of quantiles determines the granular level of dividing a continuous range into different segments. If the number is equal to 1, PLE is similar to min-max normalization. The difference is that PLE maps scalars to the range  $[-1, 1]$  while min-max normalization maps scalars to the range  $[0, 1]$ . At this time, PLE does not utilize the high dimensional vector form to indicate the statistical distribution information. If the number is infinitely large, on the other hand, the segmentation of a continuous range is highly affected by noise within data. Even a small noise level will lead to different quantiles.

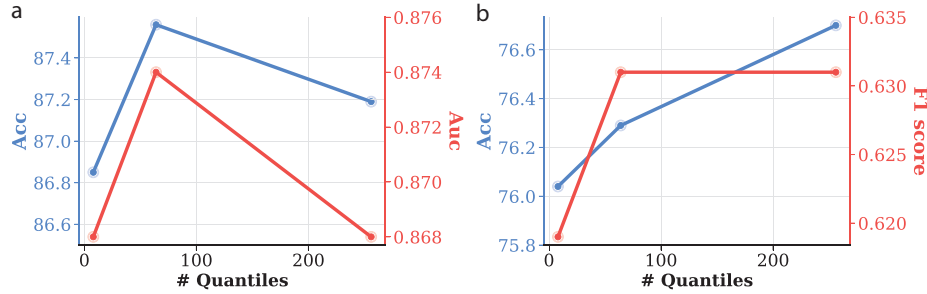

Figure 5: The effect of the number of quantiles on the model performance. Metrics are computed over tables that contain numerical columns. We examine the number of quantiles in  $\{8, 64, 256\}$ . (a) Binary classification task. (b) Multiclass classification task.

### A.2 BACKBONE MODELS

In addition to the gated transformer (Wang & Sun, 2022), we examine the performance of the TDTransformer framework using RoBERTa (Liu, 2019) as the backbone model. Table 7 shows the performance comparison for the binary classification task and Table 8 shows the performance comparison for the multiclass classification task. Figure 6 shows the comparison of the average performance. Overall, gated transformer as the backbone model has a similar performance to RoBERTa.

Table 7: Performance comparison of backbone models for the binary classification task.

| Method            | $\mathcal{S} \cup \mathcal{S}_{\text{num}}$ |      | $\gamma \leq 0.2$ |      | $0.2 < \gamma < 0.8$ |      | $\gamma \geq 0.8$ |      | Avg   |      |
|-------------------|---------------------------------------------|------|-------------------|------|----------------------|------|-------------------|------|-------|------|
|                   | Acc                                         | Auc  | Acc               | Auc  | Acc                  | Auc  | Acc               | Auc  | Acc   | Auc  |
| Gated Transformer | 87.56                                       | 0.87 | 91.67             | 0.87 | 83.94                | 0.88 | 95.40             | 0.96 | 87.79 | 0.88 |
| RoBERTa           | 87.57                                       | 0.86 | 91.70             | 0.85 | 84.14                | 0.87 | 95.49             | 0.95 | 87.92 | 0.87 |

Table 8: Performance comparison of backbone models for the multiclass classification task.

| Method            | $\mathcal{S} \cup \mathcal{S}_{\text{num}}$ |      | $ \mathcal{D}  < 2000$ |      | $ \mathcal{D}  \geq 2000$ |      | $\mathfrak{C} < 10$ |      | $\mathfrak{C} \geq 10$ |      | Avg   |      |
|-------------------|---------------------------------------------|------|------------------------|------|---------------------------|------|---------------------|------|------------------------|------|-------|------|
|                   | Acc                                         | F1   | Acc                    | F1   | Acc                       | F1   | Acc                 | F1   | Acc                    | F1   | Acc   | F1   |
| Gated Transformer | 76.30                                       | 0.63 | 78.68                  | 0.69 | 81.06                     | 0.70 | 80.89               | 0.65 | 79.00                  | 0.77 | 80.23 | 0.70 |
| RoBERTa           | 76.48                                       | 0.61 | 78.86                  | 0.67 | 81.11                     | 0.69 | 80.53               | 0.63 | 79.93                  | 0.78 | 80.32 | 0.68 |

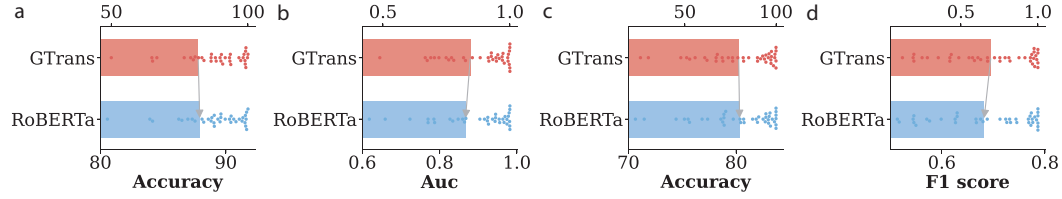

Figure 6: The performance comparison between the backbone model of gated transformer (Wang & Sun, 2022) and RoBERTa (Liu, 2019). Overall, these two backbone models have a similar performance.

### A.3 DATASET DETAILS

We summarize the statistics of tables for the binary classification task in Table 9. The total number of tables for the binary classification is 36. In the OpenML benchmark, tables are categorized into “categorical columns” and binary columns. We refine the categorization by splitting “categorical columns” into binary columns (cell values are True/False or T/F, or 0/1) and categorical columns.

Table 9: Statistics of tables for the binary classification task.

| Dataset | Spambase     | Telco-Customer | Credit   | QSar       | Arrhythmia     | Blood-Transfusion | Tic-Tac-Toe  |
|---------|--------------|----------------|----------|------------|----------------|-------------------|--------------|
| Size    | 4,601        | 7,043          | 1,000    | 1,055      | 452            | 748               | 958          |
| # Cat   | 0            | 11             | 11       | 41         | 37             | 0                 | 0            |
| # Bin   | 0            | 5              | 2        | 0          | 36             | 0                 | 0            |
| # Num   | 57           | 3              | 7        | 0          | 206            | 4                 | 9            |
| Dataset | Steel-Plates | Phoneme        | WDBC     | KC2        | Climate        | ILPD              | PC1          |
| Size    | 1,941        | 5,404          | 569      | 522        | 540            | 583               | 1,109        |
| # Cat   | 0            | 0              | 0        | 0          | 0              | 1                 | 0            |
| # Bin   | 0            | 0              | 0        | 0          | 0              | 0                 | 0            |
| # Num   | 33           | 5              | 30       | 21         | 20             | 9                 | 21           |
| Dataset | PC4          | PC3            | Scene    | Sick       | Churn          | Ailerons          | BankNote     |
| Size    | 1,458        | 1,563          | 2,407    | 3,772      | 5,000          | 7,129             | 1,372        |
| # Cat   | 0            | 0              | 0        | 3          | 2              | 0                 | 0            |
| # Bin   | 0            | 0              | 5        | 19         | 2              | 0                 | 0            |
| # Num   | 37           | 37             | 294      | 7          | 16             | 5                 | 4            |
| Dataset | Wilt         | Satellite      | Pollen   | BankMarket | JapaneseVowels | MC1               | Kin8NM       |
| Size    | 4,839        | 5,100          | 3,848    | 4,521      | 9,961          | 9,466             | 8,192        |
| # Cat   | 0            | 0              | 0        | 6          | 0              | 0                 | 0            |
| # Bin   | 0            | 0              | 0        | 3          | 0              | 0                 | 0            |
| # Num   | 5            | 36             | 5        | 7          | 14             | 38                | 8            |
| Dataset | Karhunen     | Elevators      | EyeState | Mozilla    | JM1            | BankMarketing     | ClickPredict |
| Size    | 2,000        | 9,517          | 14,980   | 15,545     | 10,885         | 45,211            | 39,948       |
| # Cat   | 0            | 0              | 0        | 0          | 0              | 6                 | 0            |
| # Bin   | 0            | 0              | 0        | 0          | 0              | 3                 | 0            |
| # Num   | 63           | 6              | 14       | 5          | 21             | 7                 | 9            |
| Dataset | Mushroom     |                |          |            |                |                   |              |
| Size    | 8,124        |                |          |            |                |                   |              |
| # Cat   | 21           |                |          |            |                |                   |              |
| # Bin   | 1            |                |          |            |                |                   |              |
| # Num   | 0            |                |          |            |                |                   |              |

Table 10 shows the statistics of tables for the multiclass classification task. The total number of tables for the multiclass classification task is 40. Same as the binary classification task, we categorize tables into categorical columns, binary columns and numerical columns.

### A.4 IMPLEMENTATION DETAILS ON BASELINE METHODS

To ensure approximately the same complexity, we use the hidden dimension of 512 and the model depth of 12 for all transformer-based architectures. The pre-training and fine-tuning processes use

Table 10: Statistics of tables for the multiclass classification task.

| Dataset | Eucalyptus | CarEval      | SolarFlare      | Car           | Okcupid         | Letter       | Soybean       |
|---------|------------|--------------|-----------------|---------------|-----------------|--------------|---------------|
| Size    | 736        | 1,728        | 1,066           | 1,728         | 50,789          | 20,000       | 683           |
| # Cat   | 5          | 7            | 12              | 6             | 17              | 0            | 33            |
| # Bin   | 0          | 14           | 0               | 0             | 0               | 0            | 2             |
| # Num   | 14         | 0            | 0               | 0             | 2               | 16           | 0             |
| # Class | 5          | 4            | 6               | 4             | 3               | 26           | 19            |
| Dataset | Karhunen   | Fourier      | Factors         | Morphological | PlantsMargin    | PlantsShape  | PlantsTexture |
| Size    | 683        | 2,000        | 2,000           | 2,000         | 1,600           | 1,600        | 1,599         |
| # Cat   | 35         | 0            | 0               | 0             | 0               | 0            | 0             |
| # Bin   | 0          | 0            | 0               | 0             | 0               | 0            | 0             |
| # Num   | 0          | 76           | 216             | 6             | 64              | 64           | 64            |
| # Class | 19         | 10           | 10              | 10            | 100             | 100          | 100           |
| Dataset | OptDigits  | MiceProtein  | Au7-1100        | Au4-2500      | Baseball        | Zernike      | SatImage      |
| Size    | 5,620      | 1,080        | 1,100           | 2,500         | 1,340           | 2,000        | 6,430         |
| # Cat   | 0          | 4            | 4               | 42            | 1               | 0            | 0             |
| # Bin   | 0          | 0            | 0               | 0             | 0               | 0            | 0             |
| # Num   | 64         | 77           | 8               | 58            | 15              | 47           | 36            |
| # Class | 10         | 8            | 5               | 3             | 3               | 10           | 6             |
| Dataset | Theorem    | Navigation   | Abalone         | Gesture       | Characters      | GasDrift     | Nursery       |
| Size    | 6,118      | 5,456        | 4,177           | 9,873         | 10,218          | 13,910       | 12,960        |
| # Cat   | 0          | 0            | 0               | 0             | 0               | 0            | 8             |
| # Bin   | 0          | 0            | 0               | 0             | 0               | 0            | 0             |
| # Num   | 51         | 24           | 8               | 32            | 7               | 128          | 0             |
| # Class | 6          | 4            | 28              | 5             | 10              | 6            | 5             |
| Dataset | Kropt      | SleepData    | CJS             | Splice        | Cardiotography  | Volcanoes-a3 | Volcano-d3    |
| Size    | 28,056     | 1,024        | 2,796           | 3,196         | 2,126           | 1,521        | 9,285         |
| # Cat   | 6          | 0            | 2               | 60            | 0               | 0            | 0             |
| # Bin   | 0          | 0            | 0               | 0             | 0               | 0            | 0             |
| # Num   | 0          | 2            | 32              | 0             | 35              | 3            | 3             |
| # Class | 18         | 4            | 6               | 3             | 3               | 5            | 5             |
| Dataset | Volcano-d1 | Nursery (VR) | RobotNavigation | ThyroidAllBP  | ThyroidAllhyper |              |               |
| Size    | 8,753      | 12,958       | 5,456           | 2,800         | 2,800           |              |               |
| # Cat   | 0          | 8            | 0               | 20            | 20              |              |               |
| # Bin   | 0          | 0            | 0               | 0             | 0               |              |               |
| # Num   | 3          | 0            | 2               | 6             | 6               |              |               |
| # Class | 5          | 4            | 4               | 5             | 5               |              |               |

the early stopping strategy with a patience of 10. Batch size  $N_{bs}$  is 128. The maximum number of training epochs is 200.

Table 11: Running time (in minutes) comparison with tree-based methods. The running time for the binary classification task is averaged over 36 tables. The running time for the multiclass classification task is averaged over 40 tables.

| Method                  | Binary classification |            |       | Multiclass classification |            |      |
|-------------------------|-----------------------|------------|-------|---------------------------|------------|------|
|                         | Time (avg) ↓          | Accuracy ↑ | Auc ↑ | Time (avg) ↓              | Accuracy ↑ | F1 ↑ |
| TDTransformer           | 32.45                 | 87.79      | 0.88  | 36.67                     | 80.23      | 0.70 |
| TDTransformer (CTA Pos) | 32.04                 | 87.48      | 0.87  | 36.53                     | 80.51      | 0.70 |
| XGBoost                 | 6.92                  | 84.97      | 0.83  | 7.48                      | 76.45      | 0.66 |
| CatBoost                | 6.94                  | 86.12      | 0.87  | 7.28                      | 76.61      | 0.65 |

## A.5 COMPARISON OF COMPUTATIONAL COST

We compare the total number of trainable parameters with deep learning methods. Figure 7 shows the comparison. Different deep learning methods have a similar number of trainable parameters. The maximum variation in the total number of trainable parameters is smaller than 2.4% while the maximum performance variation is larger than 20%.

We compare the running time of TDTransformer with tree-based methods. Similar to earlier works comparing tree-based methods and deep learning methods Grinsztajn et al. (2022); Borisov et al. (2022); Zabërgja et al. (2024), the running time of TDTransformer is longer than tree-based methods

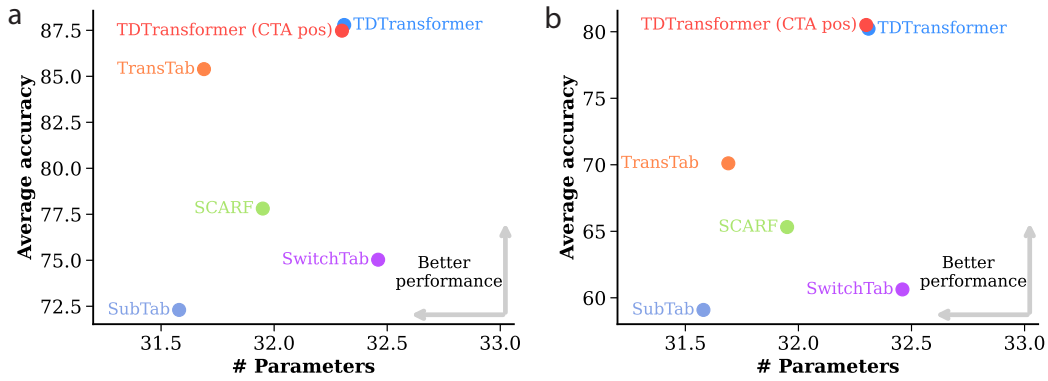

Figure 7: Comparison of the number of trainable parameters with deep learning methods. (a) Binary classification task. (b) Multiclass classification task. The maximum variation in the total number of trainable parameters is within 2.4% of model parameters.

XGBoost (Chen & Guestrin, 2016) and CatBoost (Prokhorenkova et al., 2018; Dorogush et al., 2018) as shown in Table 11.
